# Supplementary material
Source: PubMed Central journal article supplement (PMC4893936)
Supplement: NIHMS779502-supplement-1.pdf [file NIHMS779502-supplement-1.pdf]

## Supplementary Figure 1

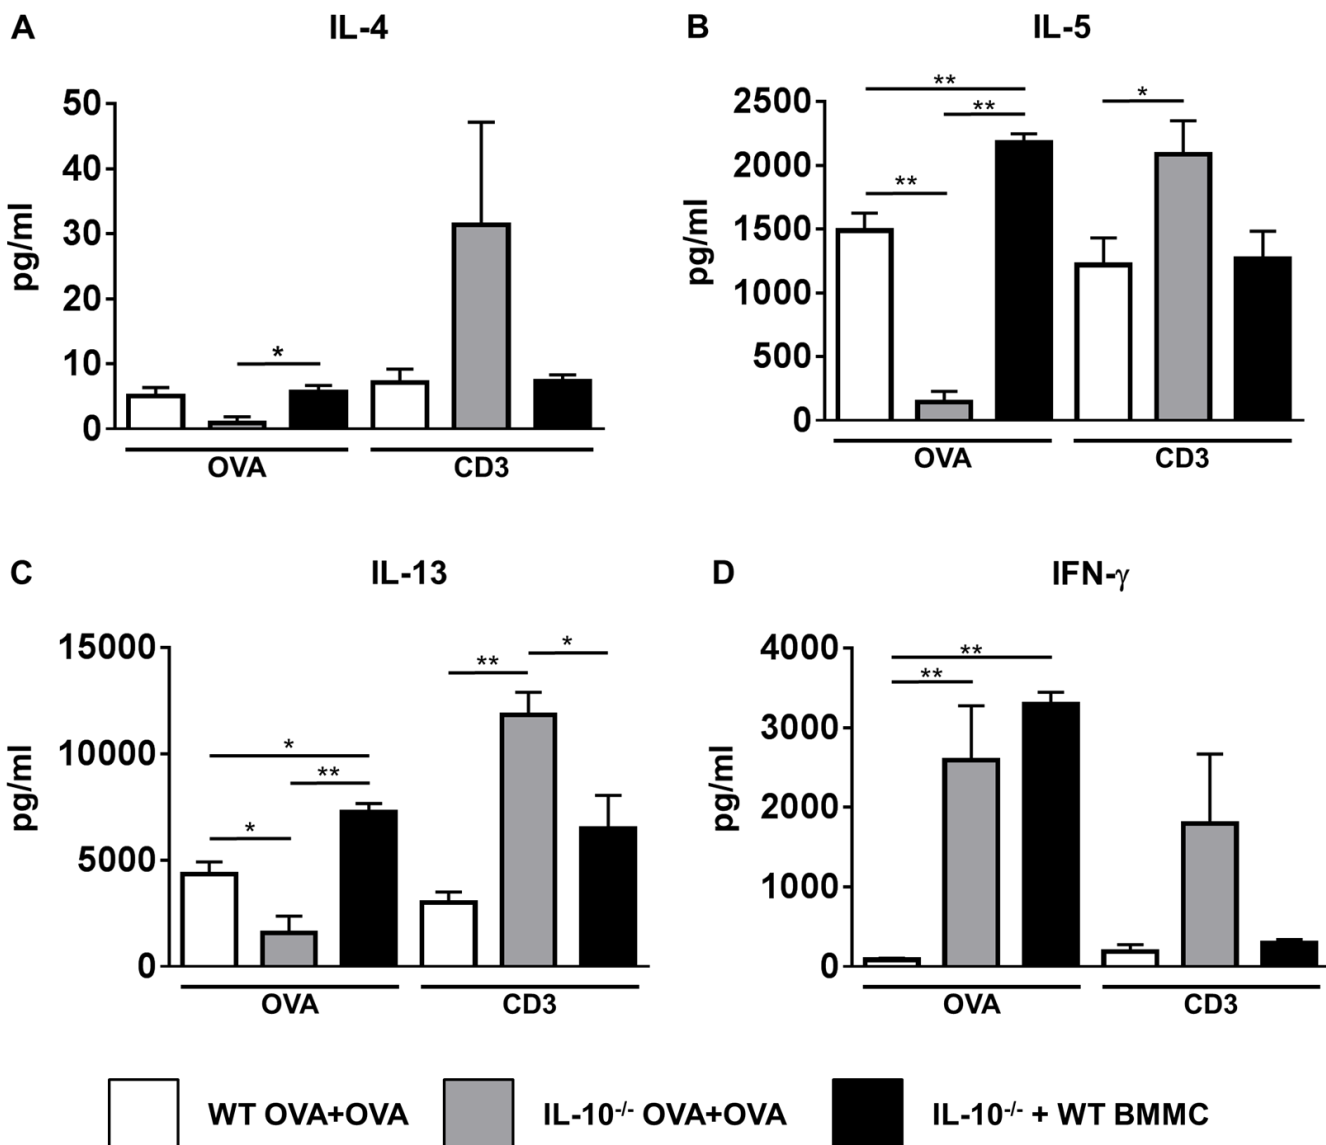

**Figure S1.** Adoptive transfer of WT BMMCs restores Th2 cytokine production by spleen cells from OVA-challenged IL-10<sup>-/-</sup> mice. Spleens were isolated from experimental animals and stimulated with either OVA or T cell agonists for 72 hours. Levels of the cytokines (A) IL-4 (B) IL-5 (C) IL-13 and (D) IFN-γ were enumerated in the supernatants by ELISA. \*= $p < 0.05$ ; \*\*= $p < 0.01$ . (student's t-test).
